# Supplementary material
Source: PubMed Central journal article supplement (PMC4495195)
Supplement: AEM.00956-15_zam015156411so1.pdf [file AEM.00956-15_zam015156411so1.pdf]

# Sakaguchi et al. Figure S1

A

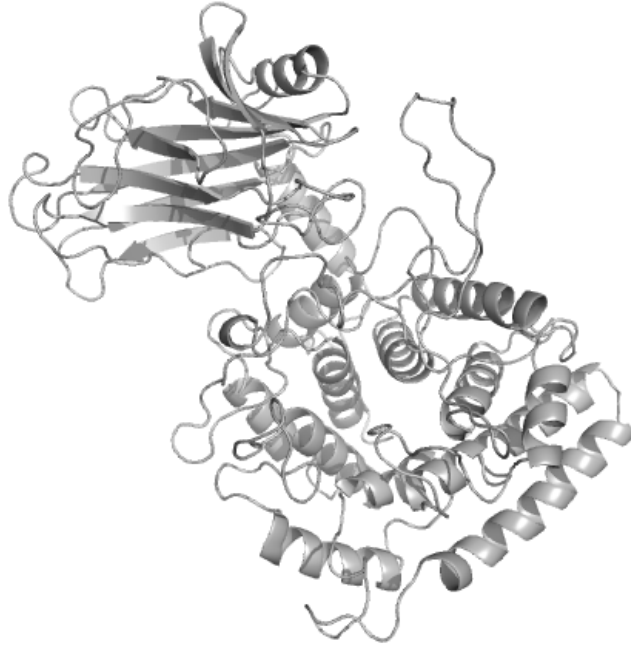

B

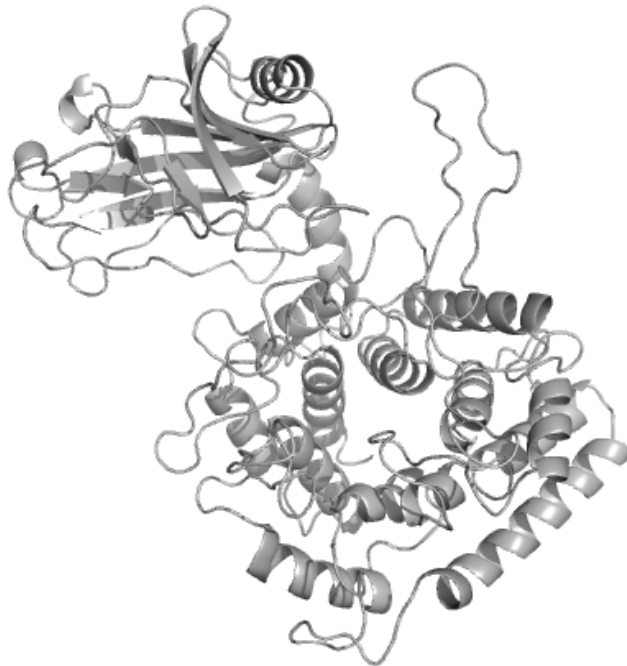

**FIG S1** Molecular models of TVN1315 (A) and Ta0286 (B). Both models were constructed by Protein Model Portal (<http://www.proteinmodelportal.org/>) using *T. thermosaccharolyticum* GA (PDB code: 1lf6) as a template.

## Sakaguchi et al. Figure S2

A

taccgtagataacgттаататссатgаааааааtaccgca

tgaactgactcat**ATGGCCTTTCATGGTCTT**

**M A F H G L**

B

cgataatgттаататссctgatctaaatacggaaagaact

gactgct**ATGGCCTTTCATGGTCTTGTTAAA**

**M A F H G L V K**

**FIG S2** Nucleotide sequences of 5'-flanking regions of *TVN1315* (A) and *Ta0286* (B) genes. Putative promoter sequences are underlined and putative Shine-Dalgarno sequences are in italics according to UCSC Archaeal Genome Browser (<http://archaea.ucsc.edu/>).

## Sakaguchi et al. Figure S3

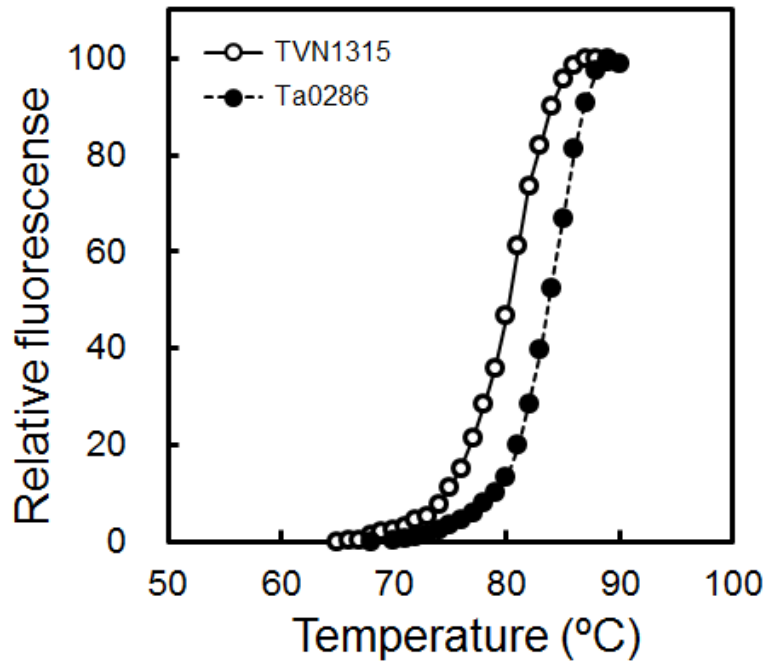

**FIG S3** DSF analysis of TVN1315 (open circle) and Ta0286 (closed circle). The experimental procedure was detailed in Materials and Methods section. Experiments were performed in triplicate and the average values are shown.
